# Supplementary material
Source: PubMed Central journal article supplement (PMC7259917)
Supplement: mmc1.pdf [file mmc1.pdf]

# THE LANCET Oncology

## Supplementary appendix

This appendix formed part of the original submission and has been peer reviewed. We post it as supplied by the authors.

Supplement to: Yang K, Sheng Y, Huang C, et al. Clinical characteristics, outcomes, and risk factors for mortality in patients with cancer and COVID-19 in Hubei, China: a multicentre, retrospective, cohort study. *Lancet Oncol* 2020; published online May 29. [http://dx.doi.org/10.1016/S1470-2045\(20\)30310-7](http://dx.doi.org/10.1016/S1470-2045(20)30310-7).

**Supplementary Table 1. Hospitals involved in the study**

| No. | Study center                                                                                                             | Principle investigator | Number of patients |
|-----|--------------------------------------------------------------------------------------------------------------------------|------------------------|--------------------|
| 1   | Jin Yin-tan Hospital, Wuhan, China<br>West Branch, Union Hospital Tongji Medical                                         | Chaolin Huang          | 73                 |
| 2   | College, Huazhong University of Science and<br>Technology, Wuhan, China<br>Cancer Center, Union Hospital, Tongji Medical | Yang Jin               | 47                 |
| 3   | College, Huazhong University of Science and<br>Technology, Wuhan, China                                                  | Gang Wu                | 29                 |
| 4   | Wuhan Red Cross Hospital, Wuhan, Hubei,<br>China<br>The Central Hospital of Wuhan, Tongji Medical                        | Nian Xiong             | 21                 |
| 5   | College, Huazhong University of Science and<br>Technology, Wuhan, China                                                  | Hongda Lu              | 14                 |
| 6   | Huagang Central Hospital, Huanggang, Hubei,<br>China                                                                     | Jing Liu               | 9                  |
| 7   | The First People's Hospital Affiliated to Yangtze<br>University, Jingzhou, China                                         | Jiyuan Yang            | 6                  |
| 8   | Xianning Central Hospital, Xianning, China                                                                               | Chengrong Shu          | 3                  |
| 9   | Suizhou Central Hospital, Suizhou, China                                                                                 | Dongfeng Pan           | 3                  |

**Supplementary Table 2. Univariable logistic regression for chemotherapy**

| Chemotherapy                    | OR (95% CI)        | p value | Number of patients |
|---------------------------------|--------------------|---------|--------------------|
| ≤ 1 week                        | 12.00 (3.15-45.75) | 0.0003  | 14                 |
| >1 week, ≤ 4 weeks              | 10.67 (3.01-37.80) | 0.0002  | 17                 |
| >4 weeks, ≤ 1 year              | 3.43 (0.86-13.75)  | 0.082   | 18                 |
| >1 year                         | 2.35 (0.78-7.03)   | 0.13    | 55                 |
| Never receiving<br>chemotherapy | ..                 | 1 (ref) | 78                 |

**Supplementary Table 3. Cancer types in 205 patients with cancer and COVID-19**

| <b>Cancer type</b>           | <b>Number</b> | <b>Cancer type</b>         | <b>Number</b> |
|------------------------------|---------------|----------------------------|---------------|
| breast                       | 40            | oral cavity                | 3             |
| colorectum                   | 28            | acute myelogenous leukemia | 2             |
| lung                         | 24            | glioma                     | 2             |
| thyroid                      | 16            | pancreas                   | 2             |
| stomach                      | 12            | bile duct                  | 1             |
| cervix                       | 9             | gall bladder               | 1             |
| lymphoma                     | 7             | testis                     | 1             |
| liver                        | 6             | osteosarcoma               | 1             |
| ovary                        | 6             | myelodysplastic syndrome   | 1             |
| prostate                     | 6             | melanoma                   | 1             |
| endometrium                  | 6             | larynx                     | 1             |
| bladder                      | 5             | skin                       | 1             |
| acute lymphoblastic leukemia | 5             | kidney                     | 1             |
| chronic lymphocytic leukemia | 4             | gastric stromal tumor      | 1             |
| esophagus                    | 4             | fibrosarcoma               | 1             |
| nasopharynx                  | 3             | penis                      | 1             |
| multiple myeloma             | 3             | ..                         | ..            |

**Supplementary Figure 1. Survival curves in patients with COVID-19 and with hematological malignancy versus solid tumor**

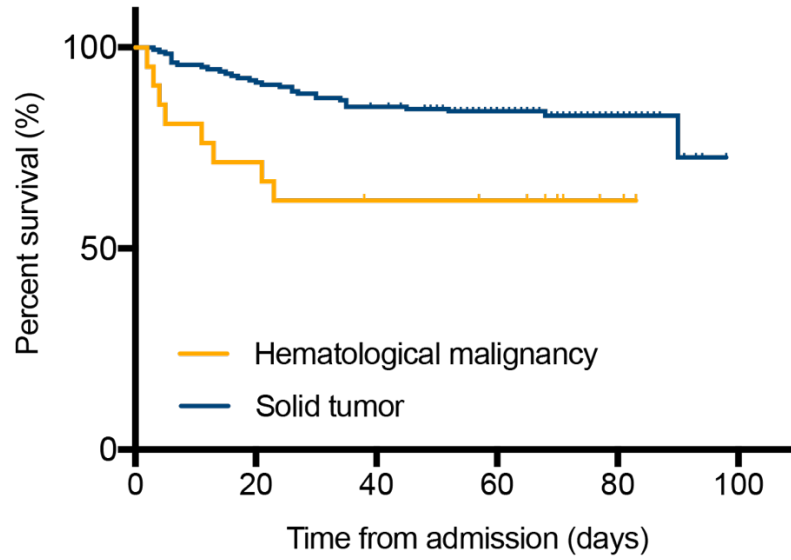

**Number at risk (number censored)**

|                          |         |         |         |          |          |         |
|--------------------------|---------|---------|---------|----------|----------|---------|
| Hematological malignancy | 22 (0)  | 15 (0)  | 12 (1)  | 11 (2)   | 3 (10)   | 0 (13)  |
| Solid tumor              | 183 (0) | 168 (0) | 153 (3) | 114 (40) | 27 (126) | 0 (152) |

Supplementary Figure 1. Hematological malignancy induces a higher risk of death. (Hazard ratio, 3.28; 95% CI 1.56-6.91; log rank p=0.0009)

**Supplementary Table 4. Demographics and baseline characteristics of patients with cancer and COVID-19**

|                                                                          | All patients<br>(n=205) | Solid tumor<br>(n=183) | Hematological<br>malignancy<br>(n=22) | p value |
|--------------------------------------------------------------------------|-------------------------|------------------------|---------------------------------------|---------|
| Age, years                                                               | 63 (56-70)              | 64 (57-70)             | 55 (26-62)                            | 0.0003  |
| Age range                                                                |                         |                        |                                       |         |
| ≤40 years                                                                | 16 (8%)                 | 7 (4%)                 | 9 (41%)                               |         |
| 41-60 years                                                              | 70 (34%)                | 63 (34%)               | 7 (32%)                               | <0.0001 |
| 61-80 years                                                              | 103 (50%)               | 97 (53%)               | 6 (27%)                               |         |
| > 80 years                                                               | 16 (8%)                 | 16 (9%)                | 0                                     |         |
| Sex                                                                      |                         |                        |                                       |         |
| Female                                                                   | 109 (53%)               | 102 (56%)              | 7 (32%)                               | 0.058   |
| Male                                                                     | 96 (47%)                | 81 (44%)               | 15 (68%)                              |         |
| Symptoms                                                                 |                         |                        |                                       |         |
| Fever                                                                    | 159 (78%)               | 140 (77%)              | 19 (86%)                              | 0.44    |
| Chills                                                                   | 17 (8%)                 | 16 (9%)                | 1 (5%)                                | 0.79    |
| Cough                                                                    | 151 (74%)               | 135 (74%)              | 16 (73%)                              | 1.00    |
| Sputum                                                                   | 70 (34%)                | 59 (32%)               | 11 (50%)                              | 0.16    |
| Chest Congestion                                                         | 67 (33%)                | 59 (32%)               | 8 (36%)                               | 0.88    |
| Short of breath                                                          | 71 (35%)                | 62 (34%)               | 9 (41%)                               | 0.68    |
| Dyspnea                                                                  | 39 (19%)                | 34 (19%)               | 5 (23%)                               | 0.86    |
| Nausea or vomiting                                                       | 14 (7%)                 | 10 (5%)                | 4 (18%)                               | 0.074   |
| Diarrhea                                                                 | 24 (12%)                | 21 (11%)               | 3 (14%)                               | 1.00    |
| Fatigue                                                                  | 75 (37%)                | 69 (38%)               | 6 (27%)                               | 0.47    |
| Median time from onset<br>of symptoms to<br>admission, days <sup>a</sup> | 12 (7-19)               | 12 (7-20)              | 11 (7-16)                             | 0.41    |
| Disease severity                                                         |                         |                        |                                       |         |
| None-severe                                                              | 153 (75%)               | 141 (77%)              | 12 (54%)                              | 0.042   |
| Severe                                                                   | 52 (25%)                | 42 (23%)               | 10 (45%)                              |         |
| Comorbidity                                                              | 106 (52%)               | 97 (53%)               | 9 (41%)                               | 0.40    |
| Hypertension                                                             | 67 (33%)                | 63 (34%)               | 4 (18%)                               | 0.20    |
| Diabetes                                                                 | 22 (11%)                | 19 (10%)               | 3 (14%)                               | 0.92    |
| COPD                                                                     | 5 (2%)                  | 5 (3%)                 | 0                                     | 0.96    |
| Coronary heart disease                                                   | 16 (8%)                 | 14 (8%)                | 2 (9%)                                | 1.00    |
| Hepatitis B                                                              | 13 (6%)                 | 12 (7%)                | 1 (5%)                                | 1.00    |
| Chronic kidney disease                                                   | 4 (2%)                  | 4 (2%)                 | 0                                     | 1.00    |
| Hospital admission before Feb 13, 2020 <sup>b</sup>                      |                         |                        |                                       |         |
| Yes                                                                      | 123 (60%)               | 107 (58%)              | 16 (73%)                              | 0.29    |
| No                                                                       | 82 (40%)                | 76 (42%)               | 6 (27%)                               |         |
| Median temperature, °C                                                   | 36.6 (36.4-36.9)        | 36.6 (36.4-36.9)       | 36.6 (36.4-37.2)                      | 0.49    |
| Median heart rate, beats<br>per min                                      | 86.0 (79.5-99.5)        | 86.0 (79.0-100.0)      | 87.0 (80.0-97.3)                      | 0.91    |
| Median respiratory rate,<br>breaths per min <sup>c</sup>                 | 20 (20-22)              | 20 (20-22)             | 22 (20-25)                            | 0.029   |
| Median SpO <sub>2</sub> , % <sup>d</sup>                                 | 97 (95-98)              | 97 (95-98)             | 97 (93-98)                            | 0.75    |

Data are median (IQR) or n (%). COPD=chronic obstructive pulmonary disease; SpO<sub>2</sub>= blood oxygen saturation.

<sup>a</sup>Data about time from onset of symptoms to admission were missing for eight patients.

<sup>b</sup>Hospital admission before Feb 13, 2020, is used to represent time period of the COVID-19 pandemic.

<sup>c</sup>Data about respiratory rate were missing for one patient.

<sup>d</sup>Data about SpO<sub>2</sub> were missing for 17 patients.

**Supplementary Table 5. Laboratory and radiologic findings of patients with cancer and COVID-19**

|                                              | <b>All patients<br/>(n=205)</b> | <b>Solid tumor<br/>(n=183)</b> | <b>Hematological<br/>malignancy<br/>(n=22)</b> | <b>p value</b> |
|----------------------------------------------|---------------------------------|--------------------------------|------------------------------------------------|----------------|
| Laboratory findings                          |                                 |                                |                                                |                |
| White blood cells, $\times 10^9$ cells per L |                                 |                                |                                                |                |
| Median                                       | 5.3 (3.9-7.5)                   | 5.3 (4.0-7.2)                  | 6.5 (2.5-15.5)                                 | 0.40           |
| <4                                           | 54/203 (27%)                    | 46/181 (25%)                   | 8/22 (36%)                                     |                |
| 4-10                                         | 124/203 (61%)                   | 118/181 (65%)                  | 6/22 (27%)                                     | 0.0002         |
| > 10                                         | 25/203 (12%)                    | 17/181 (9%)                    | 8/22 (36%)                                     |                |
| Neutrophil, $\times 10^9$ cells per L        |                                 |                                |                                                |                |
| Median                                       | 3.5 (2.5-5.5)                   | 3.4 (2.6-5.4)                  | 3.9 (1.7-6.1)                                  | 1.00           |
| <2                                           | 32/203 (16%)                    | 26/181 (14%)                   | 6/22 (27%)                                     | 0.21           |
| Lymphocyte, $\times 10^9$ cells per L        |                                 |                                |                                                |                |
| Median                                       | 0.99 (0.61-1.52)                | 0.99 (0.62-1.48)               | 1.06 (0.26-3.57)                               | 0.87           |
| <1                                           | 102/203 (50%)                   | 91/181 (50%)                   | 11/22 (50%)                                    | 1.00           |
| Platelet, $\times 10^9$ /L                   |                                 |                                |                                                |                |
| Median (IQR)                                 | 188 (134-246)                   | 194 (143-250)                  | 132 (46-189)                                   | 0.0007         |
| <100                                         | 25/203 (12%)                    | 16/181 (9%)                    | 9/22 (41%)                                     | <0.0001        |
| NLR >4                                       | 90/203 (44%)                    | 79/181 (44%)                   | 11/22 (50%)                                    | 0.73           |
| Median haemoglobin, g/L <sup>a</sup>         | 117 (105-130)                   | 119 (108-131)                  | 97 (81-116)                                    | 0.0003         |
| Median albumin, g/L <sup>b</sup>             | 33.0 (29.8-37.5)                | 33.6 (30.1-37.7)               | 30.8 (26.9-34.4)                               | 0.024          |
| Creatinine >133 $\mu$ M                      | 12/205 (6%)                     | 10/183 (5%)                    | 2/22 (9%)                                      | 0.84           |
| Blood urea nitrogen >7.1 mM                  | 47/202 (23%)                    | 40/180 (22%)                   | 7/22 (32%)                                     | 0.46           |
| Lactate dehydrogenase > 245 U/L              | 78/160 (49%)                    | 65/140 (46%)                   | 13/20 (65%)                                    | 0.19           |
| Creatine kinase > 185 U/L                    | 21/168 (13%)                    | 18/146 (12%)                   | 3/22 (14%)                                     | 1.00           |
| D-dimer > 0.5 mg/L                           | 129/185 (70%)                   | 110/164 (67%)                  | 19/21 (90%)                                    | 0.052          |
| C-reaction protein > 10 mg/L                 | 115/192 (60%)                   | 99/171 (58%)                   | 16/21 (76%)                                    | 0.17           |
| Median procalcitonin, ng/mL <sup>c</sup>     | 0.08 (0.05-0.14)                | 0.06 (0.05-0.13)               | 0.23 (0.13-1.29)                               | 0.0001         |
| Median interleukin-6, pg/mL <sup>d</sup>     | 9.5 (5.8-14.4)                  | 9.3 (5.8-14.2)                 | 11.8 (6.8-49.0)                                | 0.23           |
| Median calcium, mM <sup>e</sup>              | 2.1 (2.0-2.2)                   | 2.1 (2.0-2.2)                  | 2.0 (1.9-2.1)                                  | 0.020          |
| Radiologic findings                          |                                 |                                |                                                |                |
| Groud-glass opacity                          | 132/190 (69%)                   | 117/170 (69%)                  | 15/20 (75%)                                    | 0.76           |
| Pachy shadowing                              | 50/190 (26%)                    | 47/170 (28%)                   | 3/20 (15%)                                     | 0.34           |
| Bilateral infiltration                       | 173/190 (91%)                   | 153/170 (90%)                  | 20/20 (100%)                                   | 0.29           |
| Consolidation                                | 10/190 (5%)                     | 10/170 (6%)                    | 0                                              | 0.56           |

Data are median (IQR) or n/N (%), where N is the number of patients with available data.

NLR=neutrophil-lymphocyte ratio.

<sup>a</sup>Data about haemoglobin were missing for eight patients.

<sup>b</sup>Data about albumin were missing for 32 patients.

<sup>c</sup>Data about procalcitonin were missing for 35 patients.

<sup>d</sup>Data about interleukin-6 were missing for 82 patients.

<sup>e</sup>Data about calcium were missing for 32 patients.

**Supplementary Table 6. Treatments and complications of patients with cancer and COVID-19**

|                                        | <b>All patients<br/>(n=205)</b> | <b>Solid tumor<br/>(n=183)</b> | <b>Hematological<br/>malignancy<br/>(n=22)</b> | <b>p value</b> |
|----------------------------------------|---------------------------------|--------------------------------|------------------------------------------------|----------------|
| Median duration of hospital stay, days | 19 (12-33)                      | 19 (12-33)                     | 21 (7-30)                                      | 0.38           |
| Treatments                             |                                 |                                |                                                |                |
| Intravenous antibiotics                | 144 (70%)                       | 127 (69%)                      | 17 (77%)                                       | 0.61           |
| Antiviral medication                   | 192 (94%)                       | 171 (93%)                      | 21 (95%)                                       | 1.00           |
| Interferon                             | 71 (35%)                        | 64 (35%)                       | 7 (32%)                                        | 0.95           |
| Oseltamivir                            | 44 (21%)                        | 43 (23%)                       | 1 (5%)                                         | 0.077          |
| Umifenovir                             | 145 (71%)                       | 127 (69%)                      | 18 (82%)                                       | 0.34           |
| Ribavirin                              | 52 (25%)                        | 49 (27%)                       | 3 (14%)                                        | 0.28           |
| Lopinavir/ritonavir                    | 49 (24%)                        | 47 (26%)                       | 2 (9%)                                         | 0.14           |
| Intravenous immunoglobulin             | 60 (29%)                        | 49 (27%)                       | 11 (50%)                                       | 0.044          |
| Intravenous corticosteroids            | 62 (30%)                        | 50 (27%)                       | 12 (55%)                                       | 0.017          |
| Oxygen therapy                         | 150 (73%)                       | 129 (70%)                      | 21 (95%)                                       | 0.025          |
| Mechanical ventilation                 |                                 |                                |                                                |                |
| None                                   | 173 (84%)                       | 157 (86%)                      | 16 (73%)                                       |                |
| Non-invasive                           | 11 (5%)                         | 9 (5%)                         | 2 (9%)                                         | 0.22           |
| Invasive                               | 21 (10%)                        | 17 (9%)                        | 4 (18%)                                        |                |
| Admission to ICU                       | 30 (15%)                        | 27 (15%)                       | 3 (14%)                                        | 1.00           |
| CCRT                                   | 5 (2%)                          | 5 (3%)                         | 0                                              | 0.96           |
| Complications                          | 126/199 (63%)                   | 108 (61%)                      | 18/22 (82%)                                    | 0.094          |
| ARDS                                   | 23/199 (12%)                    | 17/177 (10%)                   | 6/22 (27%)                                     | 0.037          |
| Acute renal failure                    | 13/199 (7%)                     | 9/177 (5%)                     | 4/22 (18%)                                     | 0.059          |
| Septic shock                           | 11/199 (6%)                     | 9/177 (5%)                     | 2/22 (9%)                                      | 0.78           |
| Abnormal liver function                | 34/199 (17%)                    | 27/177 (15%)                   | 7/22 (32%)                                     | 0.10           |
| Coagulopathy                           | 18/199 (9%)                     | 13/177 (7%)                    | 5/22 (23%)                                     | 0.048          |
| Secondary infection                    | 26/199 (13%)                    | 21/177 (12%)                   | 5/22 (23%)                                     | 0.28           |
| Arrhythmia                             | 5/199 (3%)                      | 3/177 (2%)                     | 2/22 (9%)                                      | 0.17           |
| Others <sup>a</sup>                    | 34/199 (17%)                    | 27/177 (15%)                   | 7/22 (32%)                                     | 0.10           |

Data are median (IQR) or n/N (%), where N is the number of patients with available data.

ICU= Intensive-care unit; CCRT=continuous renal replacement therapy; ARDS=acute respiratory distress syndrome.

<sup>a</sup>Stroke, acute heart failure, myocardial ischemia, electrolyte disturbance, and other complications.

**Supplementary Table 7. Interaction effects between variables involved in multivariable logistic regression analysis**

| <b>Factor</b>                                  | <b>OR (95% CI)</b> | <b>p value</b> |
|------------------------------------------------|--------------------|----------------|
| Chemotherapy within 4 weeks (vs not receiving) | 4.90 (1.75-13.70)  | 0.0024         |
| Cancer type (vs solid tumor)                   | 2.10 (0.40-10.95)  | 0.38           |
| Chemotherapy within 4 weeks × Cancer type      | 1.25 (0.13-11.78)  | 0.85           |

  

| <b>Factor</b>                                                         | <b>OR (95% CI)</b> | <b>p value</b> |
|-----------------------------------------------------------------------|--------------------|----------------|
| Chemotherapy within 4 weeks                                           | ..                 | 1.00           |
| Time since cancer diagnosis (vs >5 years)                             |                    |                |
| <1 year                                                               | 2.79 (0.60-13.04)  | 0.19           |
| 1-5 years                                                             | 2.80 (0.92-8.58)   | 0.071          |
| Chemotherapy within 4 weeks × Time since cancer diagnosis (<1 year)   | ..                 | 1.00           |
| Chemotherapy within 4 weeks × Time since cancer diagnosis (1-5 years) | ..                 | 1.00           |

  

| <b>Factor</b>                                  | <b>OR (95% CI)</b> | <b>p value</b> |
|------------------------------------------------|--------------------|----------------|
| Chemotherapy within 4 weeks (vs not receiving) | 10.83 (2.45-47.82) | 0.0017         |
| Sex (vs female)                                | 5.42 (1.70-17.21)  | 0.0042         |
| Chemotherapy within 4 weeks × Sex              | 0.47 (0.07-3.05)   | 0.43           |

  

| <b>Factor</b>                                         | <b>OR (95% CI)</b> | <b>p value</b> |
|-------------------------------------------------------|--------------------|----------------|
| Cancer type (vs solid tumor)                          | 3.45 (0.32-36.98)  | 0.31           |
| Time since cancer diagnosis (vs >5 years)             |                    |                |
| <1 year                                               | 6.21 (1.87-20.64)  | 0.0029         |
| 1-5 years                                             | 3.32 (1.12-9.89)   | 0.031          |
| Cancer type × Time since cancer diagnosis (<1 year)   | 0.81 (0.05-13.56)  | 0.88           |
| Cancer type × Time since cancer diagnosis (1-5 years) | 0.72 (0.04-12.31)  | 0.82           |

  

| <b>Factor</b>                | <b>OR (95% CI)</b> | <b>p value</b> |
|------------------------------|--------------------|----------------|
| Cancer type (vs solid tumor) | 8.81 (1.67-46.44)  | 0.010          |
| Sex (vs female)              | 4.66 (1.96-11.11)  | 0.0005         |
| Cancer type × Sex            | 0.19 (0.03-1.43)   | 0.11           |

  

| <b>Factor</b>                                             | <b>OR (95% CI)</b> | <b>p value</b> |
|-----------------------------------------------------------|--------------------|----------------|
| Sex (vs female)                                           | 0.76 (0.13-4.41)   | 0.76           |
| Time since cancer diagnosis (vs >5 years)                 |                    |                |
| <1 year                                                   | 2.06 (0.42-10.24)  | 0.38           |
| 1-5 years                                                 | 1.06 (0.22-5.10)   | 0.94           |
| Sex (vs female) × Time since cancer diagnosis (<1 year)   | 9.67 (0.94-99.82)  | 0.057          |
| Sex (vs female) × Time since cancer diagnosis (1-5 years) | 6.32 (0.69-58.35)  | 0.10           |



**Supplementary Table 8. Multivariable logistic regression analysis adjusted for study center**

| Factor                                            | OR      | 95% CI     | p value |
|---------------------------------------------------|---------|------------|---------|
| Sex (vs female)                                   | 3.95    | 1.59-9.82  | 0.003   |
| Chemotherapy within 4 weeks<br>(vs not receiving) | 3.50    | 1.15-10.71 | 0.028   |
| Cancer type                                       |         |            |         |
| Solid tumor                                       | 1 (ref) | ..         | ..      |
| Hematological malignancy                          | 2.04    | 0.64-6.53  | 0.23    |
| Time since cancer diagnosis                       |         |            |         |
| <1 year                                           | 2.61    | 0.68-9.99  | 0.16    |
| 1-5 years                                         | 1.72    | 0.58-5.13  | 0.33    |
| >5 years                                          | 1 (ref) | ..         | ..      |

Note: the generalized liner mixed-effect models (GLMMs) was used for adjusting the differences between study centers.

**Supplementary Table 9. Bivariate logistic regression of factors associated with in-hospital death**

| Factor                                            | Univariable OR<br>(95% CI) | p value | Multivariable OR<br>(95% CI) | p value |
|---------------------------------------------------|----------------------------|---------|------------------------------|---------|
| Cancer type                                       |                            |         |                              |         |
| Breast                                            | 1 (ref)                    | ..      | 1 (ref)                      | ..      |
| colorectum                                        | 3.52 (0.80-15.57)          | 0.097   | 2.99 (0.40-22.38)            | 0.29    |
| lung                                              | 4.11 (0.92-18.35)          | 0.064   | 1.71 (0.23-13.02)            | 0.60    |
| thyroid                                           | 0.82 (0.08-8.55)           | 0.87    | 1.11 (0.08-15.09)            | 0.94    |
| stomach                                           | 4.11 (0.71-23.86)          | 0.12    | 2.13 (0.18-25.69)            | 0.55    |
| hematological malignancy                          | 8.54 (2.00-36.45)          | 0.0038  | 3.51 (0.52-23.53)            | 0.20    |
| Others                                            | 2.85 (0.75-10.80)          | 0.12    | 1.66 (0.27-10.16)            | 0.58    |
| Sex (vs female)                                   | 3.86 (1.80-8.25)           | 0.0005  | 3.04 (1.07-8.64)             | 0.037   |
| Chemotherapy within 4<br>weeks (vs not receiving) | 6.51 (2.78-15.28)          | <0.0001 | 3.62 (1.17-11.17)            | 0.025   |
| Time from diagnosis                               |                            |         |                              |         |
| <1 year                                           | 7.10 (2.45-20.52)          | 0.0003  | 3.21 (0.84-12.32)            | 0.089   |
| 1-5 years                                         | 3.30 (1.21-8.96)           | 0.019   | 2.02 (0.67-6.03)             | 0.21    |
| >5 years                                          | 1 (ref)                    | ..      | 1 (ref)                      | ..      |
